# Supplementary material for: Quantifying exchangeable base cations in permafrost: a reserve of nutrients about to thaw
Source: Copernicus journal article supplement (doi:10.5194/essd-15-3891-2023), 2023-09-04
Supplement: Supplementary file 1 [file essd-15-3891-2023-supplement.pdf]

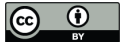

*Supplement of*

## **Quantifying exchangeable base cations in permafrost: a reserve of nutrients about to thaw**

**Elisabeth Mauclet et al.**

*Correspondence to:* Maëlle Villani ([maelle.villani@uclouvain.be](mailto:maelle.villani@uclouvain.be))

The copyright of individual parts of the supplement might differ from the article licence.

## Supplement

Table S1: Localization and field description of the soil profiles collected at the Gradient site in 2019 (Eight Mile Lake, Interior Alaska, USA). The column “n” corresponds to the number of soil layers sampled for each soil profile.

| Soil profile | n  | category                   | GPS coordinates |               | Active layer thickness (cm) | Organic layer thickness (cm) |
|--------------|----|----------------------------|-----------------|---------------|-----------------------------|------------------------------|
|              |    |                            | Latitude N      | Longitude W   |                             |                              |
| Min1         | 13 | Organic-thick soil profile | 63°52'34.3''    | 149°14'55.1'' | 55                          | 45                           |
| Min3         | 15 | Organic-thick soil profile | 63°52'33.3''    | 149°14'57''   | 60                          | 40                           |
| Mod1         | 13 | Organic-thick soil profile | 63°52'40.4''    | 149°15'18''   | 50                          | 45                           |
| Mod2         | 9  | Organic-thin soil profile  | 63°52'39.6''    | 149°15'19.4'' | 88                          | 10                           |
| Mod3         | 14 | Organic-thin soil profile  | 63°52'39.7''    | 149°15'17.6'' | 75                          | 20                           |
| Ext1         | 11 | Organic-thick soil profile | 63°52'43.7''    | 149°15'28.7'' | 48                          | 40                           |
| Ext3         | 11 | Organic-thin soil profile  | 63°52'46.6''    | 149°15'27.8'' | 65                          | 30                           |

Table S2: Soil characterization data ( $\text{pH}_{\text{KCl}}$ ,  $\text{pH}_{\text{H}_2\text{O}}$ , total organic carbon (TOC), cation exchange capacity CEC and CEC density) at Eight Mile Lake (Interior Alaska, USA).

| Thermo-karst area | category                   | Soil profile | Depth (cm) | $\text{pH}_{\text{KCl}}$ | $\text{pH}_{\text{H}_2\text{O}}$ | TOC (%) | BD ( $\text{g cm}^{-3}$ ) | CEC ( $\text{cmol}_c^{-1} \text{kg}^{-1}$ ) | CEC density ( $\text{cmol}_c \text{m}^{-3}$ ) |
|-------------------|----------------------------|--------------|------------|--------------------------|----------------------------------|---------|---------------------------|---------------------------------------------|-----------------------------------------------|
| Minimal           | Organic-thick soil profile | Min1         | 0-5        | 3.04                     | 3.88                             | 48.1    | 0.0362                    | 85.73                                       | 3102.21                                       |
|                   |                            |              | 5-10       | 2.99                     | 3.85                             | 47.6    | 0.0462                    | 93.62                                       | 4322.70                                       |
|                   |                            |              | 10-15      | 3.12                     | 3.81                             | 47.0    | 0.0572                    | 100.87                                      | 5773.50                                       |
|                   |                            |              | 15-20      | 3.22                     | 3.93                             | 45.2    | 0.0887                    | 110.85                                      | 9831.31                                       |
|                   |                            |              | 20-25      | 3.3                      | 3.97                             | 43.9    | 0.1143                    | 139.72                                      | 15972.64                                      |
|                   |                            |              | 25-30      | 3.36                     | 4.03                             | 44.6    | 0.1010                    | 113.52                                      | 11471.02                                      |
|                   |                            |              | 30-32.5    | 3.47                     | 4.21                             | 44.6    | 0.0997                    | 87.14                                       | 8688.04                                       |
|                   |                            |              | 32.5-35    | 3.52                     | 4.17                             | 42.9    | 0.1317                    | 89.41                                       | 11770.93                                      |

|          |                            |      |         |      |      |      |        |        |          |
|----------|----------------------------|------|---------|------|------|------|--------|--------|----------|
|          |                            |      | 45-55   | 3.75 | 4.19 | 8.5  | 0.7646 | 22.62  | 17294.60 |
|          |                            |      | 55-65   | 3.72 | 4.65 | 2.6  | 0.8714 | 7.86   | 6981.84  |
|          |                            |      | 65-75   | 3.76 | 4.68 | 2.2  | 0.8798 | 8.78   | 7724.48  |
|          |                            |      | 75-85   | 3.86 | 4.78 | 3.9  | 0.8481 | 10.79  | 9154.72  |
|          |                            |      | 85-120  | 3.95 | 4.64 | 5.6  | 0.8167 | 15.03  | 12272.35 |
|          |                            |      | 0-5     | 3.20 | 4.11 | 48.5 | 0.0284 | 73.34  | 2079.49  |
|          |                            |      | 5-10    | 3.02 | 3.81 | 46.9 | 0.0587 | 85.34  | 5005.84  |
|          |                            |      | 10-15   | 3.12 | 3.88 | 46.4 | 0.0682 | 72.57  | 4947.44  |
|          |                            |      | 15-20   | 3.17 | 3.85 | 45.8 | 0.0787 | 108.86 | 8567.29  |
|          |                            |      | 20-25   | 3.30 | 3.93 | 44.4 | 0.1050 | 138.24 | 14519.63 |
|          |                            |      | 30-35   | 3.68 | 4.35 | 41.9 | 0.1509 | 75.23  | 11353.67 |
| Minimal  | Organic-thick soil profile | Min3 | 35-40   | 3.89 | 4.57 | 20.3 | 0.5476 | 37.60  | 20591.07 |
|          |                            |      | 40-55   | 3.85 | 4.32 | 15.3 | 0.6388 | 32.26  | 20609.81 |
|          |                            |      | 55-60   | 3.92 | 4.49 | 22.5 | 0.5074 | 39.02  | 19796.63 |
|          |                            |      | 60-65   | 4.09 | 4.71 | 23.5 | 0.4876 | 38.22  | 18637.19 |
|          |                            |      | 65-75   | 4.24 | 4.84 | 15.3 | 0.6394 | 35.77  | 22871.14 |
|          |                            |      | 75-85   | 4.08 | 5.12 | 2.9  | 0.8658 | 15.87  | 13743.07 |
|          |                            |      | 85-95   | 4.49 | 5.35 | 9.3  | 0.7496 | 13.01  | 9749.59  |
|          |                            |      | 95-105  | 4.49 | 5.46 | 2.3  | 0.8782 | 10.07  | 8840.28  |
|          |                            |      | 105-115 | 5.25 | 5.84 | 4.7  | 0.8345 | 15.89  | 13262.55 |
|          |                            |      | 0-5     | 3.36 | 4.16 | 46.7 | 0.0628 | 82.83  | 5203.19  |
|          |                            |      | 5-10    | 3.13 | 3.76 | 46.7 | 0.0624 | 83.92  | 5232.19  |
|          |                            |      | 10-15   | 2.87 | 3.54 | 47.8 | 0.0410 | 92.48  | 3789.94  |
|          |                            |      | 15-20   | 2.85 | 3.56 | 47.4 | 0.0494 | 107.76 | 5324.29  |
|          |                            |      | 20-25   | 3.17 | 4.05 | 47.2 | 0.0534 | 129.90 | 6938.39  |
|          |                            |      | 25-30   | 3.48 | 4.07 | 45.3 | 0.0884 | 109.73 | 9698.95  |
|          |                            |      | 30-35   | 3.55 | 4.25 | 43.3 | 0.1253 | 90.02  | 11283.24 |
| Moderate | Organic-thick soil profile | Mod1 | 35-40   | 3.69 | 4.45 | 42.1 | 0.1473 | 68.14  | 10039.42 |
|          |                            |      | 40-55   | 3.76 | 4.47 | 7.6  | 0.7802 | 12.14  | 9469.81  |
|          |                            |      | 55-65   | 3.92 | 4.58 | 12.5 | 0.6912 | 29.80  | 20595.35 |
|          |                            |      | 65-75   | 4.05 | 4.78 | 28.0 | 0.4055 | 47.91  | 19426.75 |
|          |                            |      | 75-80   | 4.19 | 4.86 | 32.1 | 0.3305 | 53.64  | 17728.69 |
|          |                            |      | 85-105  | 4.28 | 5.25 | 3.3  | 0.8592 | 12.92  | 11104.61 |
| Moderate |                            | Mod2 | 0-10    | 3.45 | 3.92 | 49.7 | 0.0066 | 94.27  | 621.61   |

|  |                                               |         |      |      |      |        |        |          |
|--|-----------------------------------------------|---------|------|------|------|--------|--------|----------|
|  |                                               | 10-15   | 3.67 | 4.24 | 8.4  | 0.7660 | 32.72  | 25067.30 |
|  |                                               | 15-20   | 3.65 | 4.47 | 3.7  | 0.8512 | 19.15  | 16301.07 |
|  |                                               | 20-65   | 3.61 | 4.64 | 2.1  | 0.8819 | 19.13  | 16872.40 |
|  | Organic-thin<br>soil profile                  | 65-75   | 3.64 | 4.50 | 2.6  | 0.8719 | 18.15  | 15827.50 |
|  |                                               | 75-85   | 3.70 | 4.41 | 2.8  | 0.8689 | 15.62  | 13573.08 |
|  |                                               | 85-95   | 3.84 | 4.69 | 3.1  | 0.8632 | 14.17  | 12233.44 |
|  |                                               | 95-105  | 4.13 | 5.05 | 3.4  | 0.8570 | 15.01  | 12866.33 |
|  |                                               | 105-110 | 5.25 | 6.21 | 1.0  | 0.9012 | 10.27  | 9257.35  |
|  |                                               | 0-5     | 3.20 | 3.87 | 47.5 | 0.0480 | 89.31  | 4285.48  |
|  |                                               | 5-10    | 3.24 | 3.99 | 46.0 | 0.0750 | 94.64  | 7093.84  |
|  |                                               | 10-15   | 3.32 | 3.96 | 45.0 | 0.0933 | 108.12 | 10092.37 |
|  |                                               | 15-20   | 3.54 | 4.22 | 35.8 | 0.2617 | 88.50  | 23163.86 |
|  |                                               | 20-25   | 3.75 | 4.57 | 3.6  | 0.8539 | 20.30  | 17335.95 |
|  |                                               | 25-30   | 3.68 | 4.78 | 2.2  | 0.8800 | 12.00  | 10558.95 |
|  | Moderate Organic-thin<br>soil profile Mod3    | 30-35   | 3.67 | 4.85 | 2.3  | 0.8774 | 13.65  | 11979.90 |
|  |                                               | 35-65   | 3.77 | 4.89 | 3.9  | 0.8490 | 17.69  | 15246.68 |
|  |                                               | 65-75   | 4.52 | 5.25 | 6.2  | 0.8060 | 20.69  | 16675.54 |
|  |                                               | 75-85   | 4.44 | 5.34 | 3.3  | 0.8599 | 15.58  | 13398.17 |
|  |                                               | 85-95   | 4.99 | 6.01 | 1.4  | 0.8946 | 13.99  | 12515.28 |
|  |                                               | 95-105  | 5.37 | 6.20 | 1.7  | 0.8881 | 15.79  | 14025.02 |
|  |                                               | 105-115 | 5.94 | 6.57 | 1.6  | 0.8900 | 12.68  | 11288.08 |
|  |                                               | 115-120 | 6.80 | 7.52 | 0.7  | 0.9062 | 11.05  | 10010.04 |
|  |                                               | 0-5     | 2.96 | 3.81 | 47.7 | 0.0431 | 99.61  | 4297.06  |
|  |                                               | 5-10    | 2.80 | 3.73 | 49.0 | 0.0193 | 102.13 | 1974.95  |
|  |                                               | 10-15   | 2.82 | 3.74 | 48.6 | 0.0272 | 114.00 | 3103.86  |
|  |                                               | 15-20   | 3.14 | 3.91 | 46.6 | 0.0631 | 96.17  | 6070.88  |
|  | Extensive Organic-<br>thick soil profile Ext1 | 20-25   | 3.45 | 3.92 | 42.2 | 0.1456 | 81.47  | 11862.54 |
|  |                                               | 25-30   | 3.69 | 4.26 | 40.6 | 0.1733 | 73.87  | 12798.79 |
|  |                                               | 30-35   | 3.70 | 4.29 | 41.7 | 0.1543 | 82.33  | 12704.19 |
|  |                                               | 35-40   | 3.54 | 4.47 | 29.4 | 0.3808 | 55.51  | 21136.43 |
|  |                                               | 40-48   | 3.96 | 4.83 | 4.8  | 0.8325 | 20.30  | 16897.68 |
|  |                                               | 48-55   | 4.33 | 5.16 | 4.7  | 0.8331 | nd     | nd       |
|  |                                               | 55-65   | 4.45 | 5.12 | 5.4  | 0.8208 | 15.42  | 12653.81 |
|  |                                               | 0-5     | 2.98 | 3.78 | 48.7 | 0.0261 | 106.42 | 2772.85  |
|  | Extensive Organic-thin<br>soil profile Ext3   | 5-10    | 2.82 | 3.84 | 48.1 | 0.0370 | 113.64 | 4205.57  |
|  |                                               | 10-15   | 2.79 | 3.60 | 48.0 | 0.0387 | 117.90 | 4564.63  |
|  |                                               | 15-20   | 2.93 | 3.83 | 46.4 | 0.0671 | 91.79  | 6155.07  |

---

|       |      |      |      |        |       |          |
|-------|------|------|------|--------|-------|----------|
| 20-25 | 3.23 | 3.87 | 39.9 | 0.1865 | 82.30 | 15350.84 |
| 25-30 | 3.54 | 4.43 | 21.5 | 0.5251 | 51.89 | 27243.70 |
| 30-35 | 3.75 | 4.53 | 6.3  | 0.8048 | 24.25 | 19517.33 |
| 35-40 | 3.81 | 4.53 | 5.6  | 0.8172 | 16.90 | 13814.30 |
| 40-65 | 3.92 | 4.60 | 8.4  | 0.7664 | 25.38 | 19449.82 |
| 65-75 | 4.27 | 4.85 | 15.2 | 0.6403 | 26.17 | 16753.78 |
| 75-85 | 4.58 | 5.29 | 6.5  | 0.7999 | 13.40 | 10720.13 |
| 89-90 | 4.62 | 5.52 | 1.1  | 0.9000 | nd    | nd       |

---

Table S3: Characterization of the total and exchangeable fraction of permafrost soils at Eight Mile Lake (Interior Alaska, USA): base saturation (BS), concentrations in exchangeable Ca, K, Mg, Na, concentrations in total Ca, K, Mg, Na, Total Reserve in Bases (TRB), and proportions of exchangeable Ca, Mg, K, Na over the total concentrations.

| Thermo-<br>karst area | category                          | Soil<br>profile | Depth<br>(cm) | Base<br>saturation | Ca <sub>exch</sub><br>(g kg <sup>-1</sup> ) | K <sub>exch</sub><br>(g kg <sup>-1</sup> ) | Mg <sub>exch</sub><br>(g kg <sup>-1</sup> ) | Na <sub>exch</sub><br>(g kg <sup>-1</sup> ) | Ca <sub>bulk</sub><br>(g kg <sup>-1</sup> ) | K <sub>bulk</sub><br>(g kg <sup>-1</sup> ) | Mg <sub>bulk</sub><br>(g kg <sup>-1</sup> ) | Na <sub>bulk</sub><br>(g kg <sup>-1</sup> ) | TRB<br>(cmol <sub>c</sub> kg <sup>-1</sup> ) | Ca <sub>exch</sub> /<br>Ca <sub>bulk</sub> | K <sub>exch</sub> /<br>K <sub>bulk</sub> | Mg <sub>exch</sub> /<br>Mg <sub>bulk</sub> | Na <sub>exch</sub> /<br>Na <sub>bulk</sub> |
|-----------------------|-----------------------------------|-----------------|---------------|--------------------|---------------------------------------------|--------------------------------------------|---------------------------------------------|---------------------------------------------|---------------------------------------------|--------------------------------------------|---------------------------------------------|---------------------------------------------|----------------------------------------------|--------------------------------------------|------------------------------------------|--------------------------------------------|--------------------------------------------|
| Minimal               | Organic-<br>thick soil<br>profile | Min1            | 0-5           | 29%                | 2.59                                        | 1.38                                       | 0.95                                        | 0.20                                        | 2.82                                        | 5.49                                       | 1.33                                        | 0.69                                        | 42.10                                        | 91.6%                                      | 25.2%                                    | 71.1%                                      | 28.3%                                      |
|                       |                                   |                 | 5-10          | 28%                | 2.67                                        | 1.00                                       | 1.06                                        | 0.37                                        | 2.69                                        | 3.70                                       | 1.43                                        | 0.52                                        | 36.89                                        | 99.2%                                      | 27.1%                                    | 74.4%                                      | 71.5%                                      |
|                       |                                   |                 | 10-15         | 21%                | 2.11                                        | 0.82                                       | 0.75                                        | 0.49                                        | 2.38                                        | 2.91                                       | 1.30                                        | 0.78                                        | 33.40                                        | 88.4%                                      | 28.2%                                    | 57.7%                                      | 63.4%                                      |
|                       |                                   |                 | 15-20         | 14%                | 1.48                                        | 0.56                                       | 0.49                                        | 0.67                                        | 2.22                                        | 4.75                                       | 1.26                                        | 1.36                                        | 39.47                                        | 66.7%                                      | 11.7%                                    | 39.0%                                      | 49.5%                                      |
|                       |                                   |                 | 20-25         | 10%                | 1.46                                        | 0.28                                       | 0.47                                        | 0.42                                        | 2.21                                        | 1.57                                       | 1.15                                        | 1.09                                        | 29.24                                        | 66.0%                                      | 18.0%                                    | 40.6%                                      | 38.5%                                      |
|                       |                                   |                 | 25-30         | 13%                | 1.56                                        | 0.38                                       | 0.49                                        | 0.48                                        | 2.25                                        | 1.83                                       | 1.25                                        | 1.24                                        | 31.66                                        | 69.4%                                      | 21.0%                                    | 39.2%                                      | 38.5%                                      |
|                       |                                   |                 | 30-32.5       | 14%                | 1.38                                        | 0.17                                       | 0.46                                        | 0.34                                        | 2.40                                        | 4.88                                       | 1.49                                        | 1.93                                        | 45.13                                        | 57.5%                                      | 3.6%                                     | 30.7%                                      | 17.4%                                      |
|                       |                                   |                 | 32.5-35       | 15%                | 1.42                                        | 0.10                                       | 0.47                                        | 0.42                                        | 2.42                                        | 7.86                                       | 1.69                                        | 2.51                                        | 57.04                                        | 58.5%                                      | 1.3%                                     | 27.5%                                      | 16.6%                                      |
|                       |                                   |                 | 45-55         | 25%                | 0.46                                        | 0.06                                       | 0.18                                        | 0.41                                        | 6.55                                        | 15.59                                      | 6.62                                        | 10.97                                       | 174.71                                       | 7.1%                                       | 0.4%                                     | 2.7%                                       | 3.7%                                       |
|                       |                                   |                 | 55-65         | 73%                | 0.44                                        | 0.05                                       | 0.19                                        | 0.43                                        | 8.84                                        | 14.78                                      | 7.05                                        | 11.30                                       | 189.07                                       | 4.9%                                       | 0.4%                                     | 2.7%                                       | 3.8%                                       |
|                       |                                   |                 | 65-75         | 71%                | 0.49                                        | 0.04                                       | 0.22                                        | 0.44                                        | 8.55                                        | 15.13                                      | 6.81                                        | 12.25                                       | 190.68                                       | 5.7%                                       | 0.3%                                     | 3.2%                                       | 3.6%                                       |
| 75-85                 | 78%                               | 0.70            | 0.05          | 0.30               | 0.53                                        | 8.03                                       | 14.90                                       | 7.43                                        | 11.97                                       | 191.39                                     | 8.8%                                        | 0.3%                                        | 4.0%                                         | 4.4%                                       |                                          |                                            |                                            |
| 85-120                | 50%                               | 0.69            | 0.05          | 0.24               | 0.44                                        | 7.15                                       | 15.64                                       | 6.41                                        | 10.98                                       | 176.18                                     | 9.7%                                        | 0.3%                                        | 3.7%                                         | 4.0%                                       |                                          |                                            |                                            |
| Minimal               | Organic-<br>thick soil<br>profile | Min3            | 0-5           | 31%                | 2.38                                        | 1.17                                       | 0.84                                        | 0.16                                        | nd                                          | nd                                         | nd                                          | nd                                          | nd                                           | nd                                         | nd                                       | nd                                         | nd                                         |
|                       |                                   |                 | 5-10          | 31%                | 2.75                                        | 1.17                                       | 1.01                                        | 0.24                                        | nd                                          | nd                                         | nd                                          | nd                                          | nd                                           | nd                                         | nd                                       | nd                                         | nd                                         |
|                       |                                   |                 | 10-15         | 23%                | 1.77                                        | 0.69                                       | 0.60                                        | 0.28                                        | nd                                          | nd                                         | nd                                          | nd                                          | nd                                           | nd                                         | nd                                       | nd                                         | nd                                         |
|                       |                                   |                 | 15-20         | 14%                | 1.57                                        | 0.57                                       | 0.50                                        | 0.30                                        | nd                                          | nd                                         | nd                                          | nd                                          | nd                                           | nd                                         | nd                                       | nd                                         | nd                                         |
|                       |                                   |                 | 20-25         | 10%                | 1.47                                        | 0.33                                       | 0.42                                        | 0.34                                        | nd                                          | nd                                         | nd                                          | nd                                          | nd                                           | nd                                         | nd                                       | nd                                         | nd                                         |
|                       |                                   |                 | 30-35         | 14%                | 1.10                                        | 0.19                                       | 0.38                                        | 0.29                                        | nd                                          | nd                                         | nd                                          | nd                                          | nd                                           | nd                                         | nd                                       | nd                                         | nd                                         |

|          |                            |      |         |      |      |      |      |      |    |    |    |    |    |    |    |    |
|----------|----------------------------|------|---------|------|------|------|------|------|----|----|----|----|----|----|----|----|
|          |                            |      | 35-40   | 15%  | 0.55 | 0.11 | 0.20 | 0.24 | nd |
|          |                            |      | 40-55   | 18%  | 0.56 | 0.07 | 0.19 | 0.25 | nd |
|          |                            |      | 55-60   | 22%  | 1.18 | 0.06 | 0.16 | 0.34 | nd |
|          |                            |      | 60-65   | 31%  | 1.74 | 0.07 | 0.21 | 0.32 | nd |
|          |                            |      | 65-75   | 37%  | 1.89 | 0.08 | 0.25 | 0.37 | nd |
|          |                            |      | 75-85   | 55%  | 0.85 | 0.10 | 0.35 | 0.32 | nd |
|          |                            |      | 85-95   | 108% | 1.40 | 0.08 | 0.63 | 0.37 | nd |
|          |                            |      | 95-105  | 70%  | 0.78 | 0.08 | 0.28 | 0.15 | nd |
|          |                            |      | 105-115 | 83%  | 1.83 | 0.03 | 0.41 | 0.16 | nd |
|          |                            |      | 0-5     | 37%  | 2.92 | 1.64 | 1.42 | 0.06 | nd |
|          |                            |      | 5-10    | 30%  | 2.13 | 1.54 | 1.24 | 0.05 | nd |
|          |                            |      | 10-15   | 21%  | 1.55 | 1.32 | 0.98 | 0.10 | nd |
|          |                            |      | 15-20   | 18%  | 1.93 | 1.19 | 0.81 | 0.10 | nd |
|          |                            |      | 20-25   | 17%  | 2.69 | 0.72 | 0.71 | 0.20 | nd |
|          |                            |      | 25-30   | 20%  | 2.77 | 0.44 | 0.75 | 0.19 | nd |
| Moderate | Organic-thick soil profile | Mod1 | 30-35   | 22%  | 2.52 | 0.30 | 0.70 | 0.24 | nd |
|          |                            |      | 35-40   | 23%  | 1.90 | 0.22 | 0.58 | 0.18 | nd |
|          |                            |      | 40-55   | 30%  | 0.37 | 0.02 | 0.16 | 0.09 | nd |
|          |                            |      | 55-65   | 31%  | 1.10 | 0.04 | 0.34 | 0.21 | nd |
|          |                            |      | 65-75   | 16%  | 1.06 | 0.04 | 0.22 | 0.09 | nd |
|          |                            |      | 75-80   | 24%  | 1.83 | 0.03 | 0.38 | 0.11 | nd |
|          |                            |      | 85-105  | 56%  | 0.92 | 0.04 | 0.26 | 0.11 | nd |
|          |                            |      | 0-10    | 24%  | 2.58 | 0.91 | 0.79 | 0.14 | nd |
|          |                            |      | 10-15   | 24%  | 0.94 | 0.08 | 0.30 | 0.10 | nd |
| Moderate | Organic-thin soil profile  | Mod2 | 15-20   | 41%  | 0.87 | 0.03 | 0.33 | 0.16 | nd |
|          |                            |      | 20-65   | 41%  | 0.80 | 0.03 | 0.37 | 0.17 | nd |
|          |                            |      | 65-75   | 33%  | 0.65 | 0.05 | 0.25 | 0.13 | nd |

|           |                            |         |        |      |      |      |      |      |       |       |       |        |        |       |       |       |       |
|-----------|----------------------------|---------|--------|------|------|------|------|------|-------|-------|-------|--------|--------|-------|-------|-------|-------|
|           |                            | 75-85   | 39%    | 0.67 | 0.09 | 0.24 | 0.11 | nd   | nd    | nd    | nd    | nd     | nd     | nd    | nd    |       |       |
|           |                            | 85-95   | 56%    | 0.93 | 0.09 | 0.29 | 0.14 | nd   | nd    | nd    | nd    | nd     | nd     | nd    | nd    |       |       |
|           |                            | 95-105  | 62%    | 1.16 | 0.08 | 0.33 | 0.13 | nd   | nd    | nd    | nd    | nd     | nd     | nd    | nd    |       |       |
|           |                            | 105-110 | 102%   | 1.31 | 0.07 | 0.42 | 0.09 | nd   | nd    | nd    | nd    | nd     | nd     | nd    | nd    |       |       |
| Moderate  | Organic-thin soil profile  | Mod3    | 0-5    | 25%  | 2.63 | 1.09 | 0.70 | 0.06 | 2.95  | 7.01  | 1.31  | 0.84   | 47.08  | 89.1% | 15.6% | 53.7% | 6.8%  |
|           |                            |         | 5-10   | 28%  | 2.78 | 0.76 | 1.07 | 0.46 | 2.82  | 4.18  | 1.83  | 1.26   | 45.28  | 98.3% | 18.2% | 58.9% | 36.6% |
|           |                            |         | 10-15  | 22%  | 2.67 | 0.65 | 0.98 | 0.11 | 2.76  | 3.28  | 1.53  | 0.69   | 37.73  | 96.5% | 19.9% | 63.9% | 16.1% |
|           |                            |         | 15-20  | 17%  | 1.94 | 0.28 | 0.52 | 0.09 | 2.42  | 4.76  | 2.25  | 2.30   | 52.76  | 80.1% | 5.8%  | 23.0% | 4.0%  |
|           |                            |         | 20-25  | 42%  | 0.97 | 0.03 | 0.37 | 0.13 | 7.24  | 15.13 | 7.49  | 11.09  | 184.68 | 13.4% | 0.2%  | 5.0%  | 1.2%  |
|           |                            |         | 25-30  | 69%  | 0.95 | 0.02 | 0.34 | 0.16 | 7.37  | 15.97 | 7.22  | 11.21  | 185.79 | 12.9% | 0.1%  | 4.7%  | 1.4%  |
|           |                            |         | 30-35  | 63%  | 0.98 | 0.03 | 0.35 | 0.17 | 7.38  | 15.99 | 6.56  | 10.33  | 176.57 | 13.3% | 0.2%  | 5.3%  | 1.6%  |
|           |                            |         | 35-65  | 39%  | 0.83 | 0.03 | 0.26 | 0.14 | 7.09  | 16.36 | 7.47  | 11.43  | 188.38 | 11.7% | 0.2%  | 3.4%  | 1.2%  |
|           |                            |         | 65-75  | 62%  | 1.81 | 0.07 | 0.36 | 0.13 | 8.85  | 15.85 | 7.71  | 10.53  | 193.98 | 20.5% | 0.5%  | 4.7%  | 1.3%  |
|           |                            |         | 75-85  | 66%  | 1.35 | 0.08 | 0.33 | 0.12 | 9.22  | 16.63 | 8.16  | 11.76  | 206.86 | 14.6% | 0.5%  | 4.1%  | 1.0%  |
|           |                            |         | 85-95  | 76%  | 1.36 | 0.09 | 0.40 | 0.09 | 8.60  | 16.65 | 8.20  | 11.67  | 203.73 | 15.8% | 0.5%  | 4.8%  | 0.8%  |
|           |                            |         | 95-105 | 74%  | 1.53 | 0.09 | 0.42 | 0.09 | 8.24  | 15.75 | 8.35  | 11.53  | 200.26 | 18.6% | 0.6%  | 5.0%  | 0.8%  |
|           |                            | 105-115 | 95%    | 1.61 | 0.10 | 0.42 | 0.08 | 9.96 | 15.31 | 9.21  | 12.08 | 217.18 | 16.2%  | 0.7%  | 4.5%  | 0.6%  |       |
|           |                            | 115-120 | 116%   | 1.61 | 0.10 | 0.49 | 0.11 | 8.90 | 15.99 | 7.98  | 11.37 | 200.50 | 18.1%  | 0.6%  | 6.1%  | 1.0%  |       |
| Extensive | Organic-thick soil profile | Ext1    | 0-5    | 20%  | 2.25 | 1.19 | 0.61 | 0.04 | nd    | nd    | nd    | nd     | nd     | nd    | nd    | nd    |       |
|           |                            |         | 5-10   | 17%  | 1.78 | 0.96 | 0.67 | 0.04 | nd    | nd    | nd    | nd     | nd     | nd    | nd    | nd    | nd    |
|           |                            |         | 10-15  | 14%  | 1.62 | 0.79 | 0.75 | 0.04 | nd    | nd    | nd    | nd     | nd     | nd    | nd    | nd    | nd    |
|           |                            |         | 15-20  | 16%  | 1.87 | 0.41 | 0.54 | 0.08 | nd    | nd    | nd    | nd     | nd     | nd    | nd    | nd    | nd    |
|           |                            |         | 20-25  | 16%  | 1.72 | 0.15 | 0.40 | 0.09 | nd    | nd    | nd    | nd     | nd     | nd    | nd    | nd    | nd    |
|           |                            |         | 25-30  | 12%  | 1.18 | 0.08 | 0.26 | 0.08 | nd    | nd    | nd    | nd     | nd     | nd    | nd    | nd    | nd    |
|           |                            |         | 30-35  | 10%  | 1.16 | 0.06 | 0.26 | 0.07 | nd    | nd    | nd    | nd     | nd     | nd    | nd    | nd    | nd    |



|           |                                  |      |       |      |      |      |      |      |    |    |    |       |       |       |       |       |
|-----------|----------------------------------|------|-------|------|------|------|------|------|----|----|----|-------|-------|-------|-------|-------|
|           | 35-40                            | 11%  | 0.81  | 0.03 | 0.20 | 0.06 | nd   | nd   | nd | nd | nd | 35.0% | 0.2%  | nd    | nd    |       |
|           | 40-48                            | 28%  | 0.73  | 0.01 | 0.19 | 0.10 | nd   | nd   | nd | nd | nd | 8.4%  | 0.1%  | nd    | nd    |       |
|           | 48-55                            | nd   | nd    | nd   | nd   | nd   | nd   | nd   | nd | nd | nd | nd    | nd    | nd    | nd    |       |
|           | 55-65                            | 57%  | 1.24  | 0.05 | 0.24 | 0.11 | nd   | nd   | nd | nd | nd | 12.1% | 0.3%  | nd    | nd    |       |
| Extensive | Organic-<br>thin soil<br>profile | Ext3 | 0-5   | 20%  | 2.38 | 1.05 | 0.74 | 0.07 | nd | nd | nd | nd    | 85.1% | 19.8% | 66.4% | 13.9% |
|           |                                  |      | 5-10  | 16%  | 1.81 | 0.97 | 0.81 | 0.04 | nd | nd | nd | nd    | 73.0% | 18.5% | 69.4% | 10.8% |
|           |                                  |      | 10-15 | 13%  | 1.36 | 0.80 | 0.73 | 0.05 | nd | nd | nd | nd    | 58.1% | 16.1% | 54.7% | 6.5%  |
|           |                                  |      | 15-20 | 17%  | 1.71 | 0.49 | 0.69 | 0.07 | nd | nd | nd | nd    | 68.2% | 12.4% | 50.0% | 5.1%  |
|           |                                  |      | 20-25 | 13%  | 1.27 | 0.33 | 0.43 | 0.07 | nd | nd | nd | nd    | 53.7% | 5.1%  | 21.2% | 3.0%  |
|           |                                  |      | 25-30 | 11%  | 0.73 | 0.07 | 0.20 | 0.06 | nd | nd | nd | nd    | 29.0% | 0.5%  | 12.7% | 2.5%  |
|           |                                  |      | 30-35 | 19%  | 0.50 | 0.02 | 0.19 | 0.11 | nd | nd | nd | nd    | 6.5%  | 0.1%  | 2.4%  | 1.0%  |
|           |                                  |      | 35-40 | 19%  | 0.34 | 0.02 | 0.13 | 0.09 | nd | nd | nd | nd    | 4.6%  | 0.1%  | 1.8%  | 0.8%  |
|           |                                  |      | 40-65 | 17%  | 0.54 | 0.02 | 0.14 | 0.12 | nd | nd | nd | nd    | 7.8%  | 0.1%  | 2.0%  | 1.1%  |
|           |                                  |      | 65-75 | 34%  | 1.32 | 0.04 | 0.20 | 0.12 | nd | nd | nd | nd    | 20.5% | 0.2%  | 4.0%  | 1.4%  |
|           |                                  |      | 75-85 | 58%  | 1.10 | 0.05 | 0.23 | 0.07 | nd | nd | nd | nd    | 12.9% | 0.4%  | 3.8%  | 0.7%  |
|           | 89-90                            | nd   | nd    | nd   | nd   | nd   | nd   | nd   | nd | nd | nd | nd    | nd    | nd    | nd    |       |

Table S4: Characterization of the exchangeable fraction of permafrost soils at Eight Mile Lake (Interior Alaska, USA): exchangeable base cations density and stock.

| Thermo-karst area | Category                   | Soil profile | Depth (cm) | density (g m <sup>-3</sup> ) |                   |                    |                    | stock (g m <sup>-2</sup> ) |                   |                    |                    |
|-------------------|----------------------------|--------------|------------|------------------------------|-------------------|--------------------|--------------------|----------------------------|-------------------|--------------------|--------------------|
|                   |                            |              |            | Ca <sub>exch</sub>           | K <sub>exch</sub> | Mg <sub>exch</sub> | Na <sub>exch</sub> | Ca <sub>exch</sub>         | K <sub>exch</sub> | Mg <sub>exch</sub> | Na <sub>exch</sub> |
| Minimal           | Organic-thick soil profile | Min3         | 0-5        | 67.47                        | 33.09             | 23.87              | 4.62               | 3.37                       | 1.65              | 1.19               | 0.23               |
|                   |                            |              | 5-10       | 161.41                       | 68.81             | 59.01              | 13.91              | 8.07                       | 3.44              | 2.95               | 0.70               |
|                   |                            |              | 10-15      | 120.95                       | 46.72             | 40.67              | 19.02              | 6.05                       | 2.34              | 2.03               | 0.95               |
|                   |                            |              | 15-20      | 123.91                       | 44.80             | 39.65              | 23.96              | 6.20                       | 2.24              | 1.98               | 1.20               |
|                   |                            |              | 20-25      | 154.81                       | 34.48             | 44.38              | 35.88              | 7.74                       | 1.72              | 2.22               | 1.79               |
|                   |                            |              | 30-35      | 165.59                       | 29.42             | 57.30              | 43.45              | 16.56                      | 2.94              | 5.73               | 4.34               |
|                   |                            |              | 35-40      | 298.72                       | 61.16             | 109.91             | 133.59             | 14.94                      | 3.06              | 5.50               | 6.68               |
|                   |                            |              | 40-55      | 358.49                       | 43.62             | 123.58             | 162.49             | 53.77                      | 6.54              | 18.54              | 24.37              |
|                   |                            |              | 55-60      | 596.94                       | 29.75             | 78.86              | 171.90             | 29.85                      | 1.49              | 3.94               | 8.60               |
|                   |                            |              | 60-65      | 848.07                       | 32.04             | 100.38             | 158.07             | 42.40                      | 1.60              | 5.02               | 7.90               |
|                   |                            |              | 65-75      | 1208.19                      | 52.34             | 156.66             | 239.27             | 120.82                     | 5.23              | 15.67              | 23.93              |
|                   |                            |              | 75-85      | 737.02                       | 84.88             | 301.65             | 280.58             | 73.70                      | 8.49              | 30.17              | 28.06              |
| 85-95             | 1047.52                    | 63.08        | 475.44     | 274.93                       | 104.75            | 6.31               | 47.54              | 27.49                      |                   |                    |                    |
| 95-100            | 684.33                     | 69.60        | 241.80     | 134.11                       | 34.22             | 3.48               | 12.09              | 6.71                       |                   |                    |                    |
| Moderate          | Organic-thick soil profile | Mod1         | 0-5        | 183.56                       | 102.84            | 88.89              | 3.90               | 9.18                       | 5.14              | 4.44               | 0.19               |
|                   |                            |              | 5-10       | 132.87                       | 95.98             | 77.54              | 3.42               | 6.64                       | 4.80              | 3.88               | 0.17               |
|                   |                            |              | 10-15      | 63.50                        | 53.98             | 40.03              | 4.08               | 3.17                       | 2.70              | 2.00               | 0.20               |
|                   |                            |              | 15-20      | 95.49                        | 58.88             | 40.16              | 5.16               | 4.77                       | 2.94              | 2.01               | 0.26               |
|                   |                            |              | 20-25      | 143.61                       | 38.66             | 37.68              | 10.94              | 7.18                       | 1.93              | 1.88               | 0.55               |
|                   |                            |              | 25-30      | 244.49                       | 38.56             | 66.31              | 16.98              | 12.22                      | 1.93              | 3.32               | 0.85               |
|                   |                            |              | 30-35      | 316.26                       | 37.19             | 87.68              | 30.37              | 15.81                      | 1.86              | 4.38               | 1.52               |
|                   |                            |              | 35-40      | 280.41                       | 32.77             | 85.53              | 26.76              | 14.02                      | 1.64              | 4.28               | 1.34               |
|                   |                            |              | 40-55      | 284.80                       | 18.09             | 125.05             | 72.60              | 42.72                      | 2.71              | 18.76              | 10.89              |
|                   |                            |              | 55-65      | 761.22                       | 28.85             | 233.57             | 142.08             | 76.12                      | 2.88              | 23.36              | 14.21              |
|                   |                            |              | 65-75      | 427.87                       | 16.34             | 89.83              | 35.83              | 42.79                      | 1.63              | 8.98               | 3.58               |
|                   |                            |              | 75-80      | 604.31                       | 10.23             | 126.32             | 34.90              | 30.22                      | 0.51              | 6.32               | 1.75               |
| 85-100            | 788.38                     | 32.91        | 219.49     | 97.38                        | 157.68            | 6.58               | 43.90              | 19.48                      |                   |                    |                    |
| Moderate          | Organic-thin soil profile  | Mod2         | 0-10       | 17.04                        | 5.97              | 5.21               | 0.89               | 1.70                       | 0.60              | 0.52               | 0.09               |
|                   |                            |              | 10-15      | 723.61                       | 58.89             | 231.95             | 75.46              | 36.18                      | 2.94              | 11.60              | 3.77               |

|          |                           |      |        |         |       |        |        |        |       |        |       |
|----------|---------------------------|------|--------|---------|-------|--------|--------|--------|-------|--------|-------|
|          |                           |      | 15-20  | 744.41  | 28.89 | 284.68 | 132.89 | 37.22  | 1.44  | 14.23  | 6.64  |
|          |                           |      | 20-65  | 708.12  | 26.15 | 322.12 | 146.02 | 318.66 | 11.77 | 144.95 | 65.71 |
|          |                           |      | 65-75  | 566.20  | 44.91 | 215.11 | 109.19 | 56.62  | 4.49  | 21.51  | 10.92 |
|          |                           |      | 75-85  | 583.41  | 74.03 | 209.61 | 99.09  | 58.34  | 7.40  | 20.96  | 9.91  |
|          |                           |      | 85-95  | 804.23  | 80.31 | 248.60 | 123.21 | 80.42  | 8.03  | 24.86  | 12.32 |
|          |                           |      | 95-100 | 994.80  | 70.03 | 279.66 | 109.11 | 49.74  | 3.50  | 13.98  | 5.46  |
| Moderate | Organic-thin soil profile | Mod3 | 0-5    | 126.07  | 52.48 | 33.72  | 2.74   | 6.30   | 2.62  | 1.69   | 0.14  |
|          |                           |      | 5-10   | 208.10  | 57.09 | 80.52  | 34.52  | 10.41  | 2.85  | 4.03   | 1.73  |
|          |                           |      | 10-15  | 248.93  | 60.99 | 91.05  | 10.35  | 12.45  | 3.05  | 4.55   | 0.52  |
|          |                           |      | 15-20  | 508.15  | 72.06 | 135.32 | 23.88  | 25.41  | 3.60  | 6.77   | 1.19  |
|          |                           |      | 20-25  | 826.15  | 23.47 | 316.65 | 110.13 | 41.31  | 1.17  | 15.83  | 5.51  |
|          |                           |      | 25-30  | 836.59  | 15.21 | 300.64 | 140.13 | 41.83  | 0.76  | 15.03  | 7.01  |
|          |                           |      | 30-35  | 861.50  | 22.93 | 303.65 | 145.93 | 43.07  | 1.15  | 15.18  | 7.30  |
|          |                           |      | 35-65  | 712.72  | 27.13 | 220.24 | 118.38 | 213.81 | 8.14  | 66.07  | 35.51 |
|          |                           |      | 65-75  | 1461.13 | 59.55 | 292.87 | 106.71 | 146.11 | 5.96  | 29.29  | 10.67 |
|          |                           |      | 75-85  | 1160.34 | 68.93 | 286.62 | 105.90 | 116.03 | 6.89  | 28.66  | 10.59 |
|          |                           |      | 85-95  | 1214.58 | 76.30 | 353.79 | 83.41  | 121.46 | 7.63  | 35.38  | 8.34  |
|          |                           |      | 95-100 | 1360.93 | 82.12 | 374.24 | 78.32  | 68.05  | 4.11  | 18.71  | 3.92  |

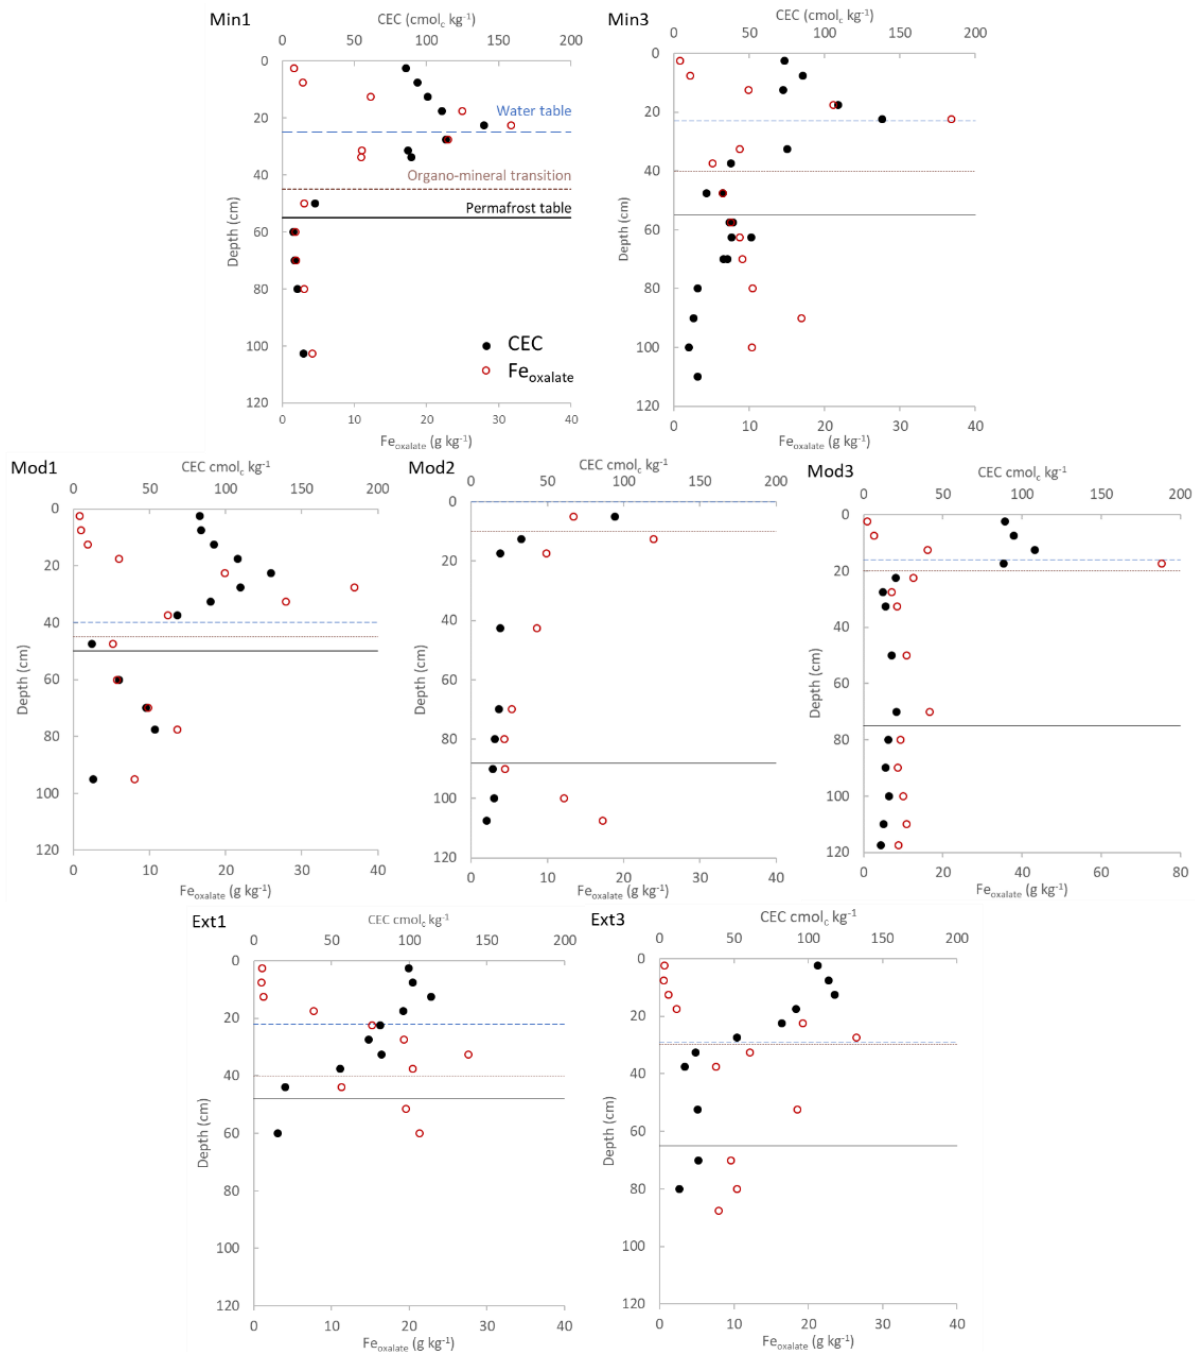

Figure S1: Distribution of the potential cation exchange capacity (CEC) and concentration in oxalate extractable Fe with depth, for the seven permafrost soil profiles (Min1, Min3, Mod1, Mod2, Mod3, Ext1, Ext3) at the Gradient site (Eight Mile Lake, Interior Alaska, USA). The oxalate extraction targets Fe from poorly crystalline oxides and complexes with organic carbon. The oxalate extractable Fe data are from Monhonval, 2022, Influence of permafrost thaw on mineral organic carbon interactions, UCLouvain, ID483, 283p., <http://hdl.handle.net/2078.1/266169>.
